# Supplementary material
Source: Springer Nature journal article supplement (https://www.springerprofessional.de/resource/supplementary/40095_2011_8_MOESM8_ESM.pdf/11899688)

System Architecture: 6 Windmatic 925 kW 925kW Diesel 250 kW Rectifier Total NPC: \$ 10,874,687  
 3 NorthWind 100 500 Trojan T-105 Load Following Levelized COE: \$ 0.218/kWh  
 925 kW 925kW Diesel 250 kW Inverter Operating Cost: \$ 717,349/yr

Cost Summary | Cash Flow | Electrical | WM15S | NW100 | D925 | D925 | Battery | Converter | Emissions | Hourly Data |

| Production    |                  |            | Consumption     |           |     | Quantity            |         |      |
|---------------|------------------|------------|-----------------|-----------|-----|---------------------|---------|------|
|               | kWh/yr           | %          |                 | kWh/yr    | %   |                     | kWh/yr  | %    |
| Wind turbines | 1,660,323        | 37         | AC primary load | 4,281,096 | 100 | Excess electricity  | 153,828 | 3.42 |
| 925kW Diesel  | 2,834,641        | 63         | Total           | 4,281,096 | 100 | Unmet electric load | 0.00903 | 0.00 |
| 925kW Diesel  | 1,110            | 0          |                 |           |     | Capacity storage    | 0.00    | 0.00 |
| <b>Total</b>  | <b>4,496,074</b> | <b>100</b> |                 |           |     |                     |         |      |

| Quantity           | Value |
|--------------------|-------|
| Renewable fraction | 0.369 |

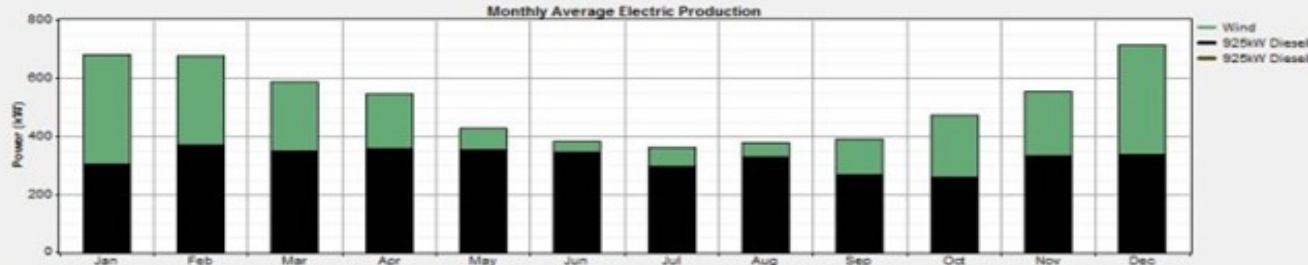

Figure 8: Expected electrical performance of the proposed hybrid power system

| Quantity            | Value |
|---------------------|-------|
| String size         | 20    |
| Strings in parallel | 25    |
| Batteries           | 500   |
| Bus voltage (V)     | 120   |

| Quantity                | Value   | Units  |
|-------------------------|---------|--------|
| Nominal capacity        | 675     | kWh    |
| Usable nominal capacity | 473     | kWh    |
| Autonomy                | 0.967   | hr     |
| Lifetime throughput     | 422,500 | kWh    |
| Battery wear cost       | 0.270   | \$/kWh |
| Average energy cost     | 0.000   | \$/kWh |

| Quantity          | Value  | Units  |
|-------------------|--------|--------|
| Energy in         | 73,239 | kWh/yr |
| Energy out        | 62,302 | kWh/yr |
| Storage depletion | 52     | kWh/yr |
| Losses            | 10,885 | kWh/yr |
| Annual throughput | 67,576 | kWh/yr |
| Expected life     | 6.25   | yr     |

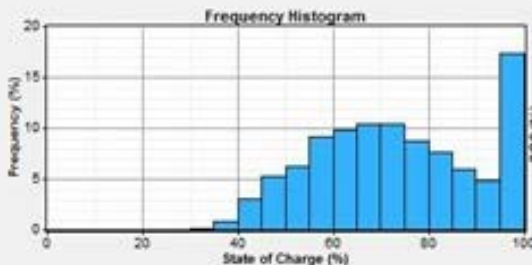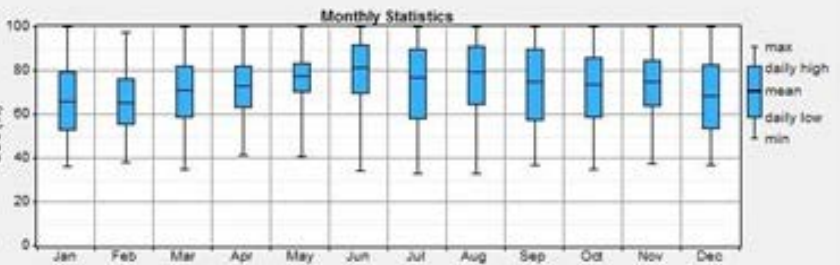

Supplement: MOESM8 [file 11899688]
